# Supplementary material
Source: PubMed Central journal article supplement (PMC3811237)

Supplement to Steier et al., “Flucytosine antagonism of azole activity versus *Candida glabrata*: Role of transcription factor Pdr1 and multidrug transporter Cdr1”

Fig. S1. Exposure to 5FC induces mitochondrial petites in *C. glabrata*. Equivalent log phase cultures of strain 200989 *ade2Δ::TRP1* were incubated with (left) or without (right) 5 μg/ml 5FC in YPD for 24 h at 35°C, then diluted, spread on drug-free YPD, and incubated an additional 3 days. Red colonies indicate wild-type mitochondria, and white colonies represent petites (confirmed by replica plating representative red and white colonies on YP-dextrose and YP-glycerol; not shown).

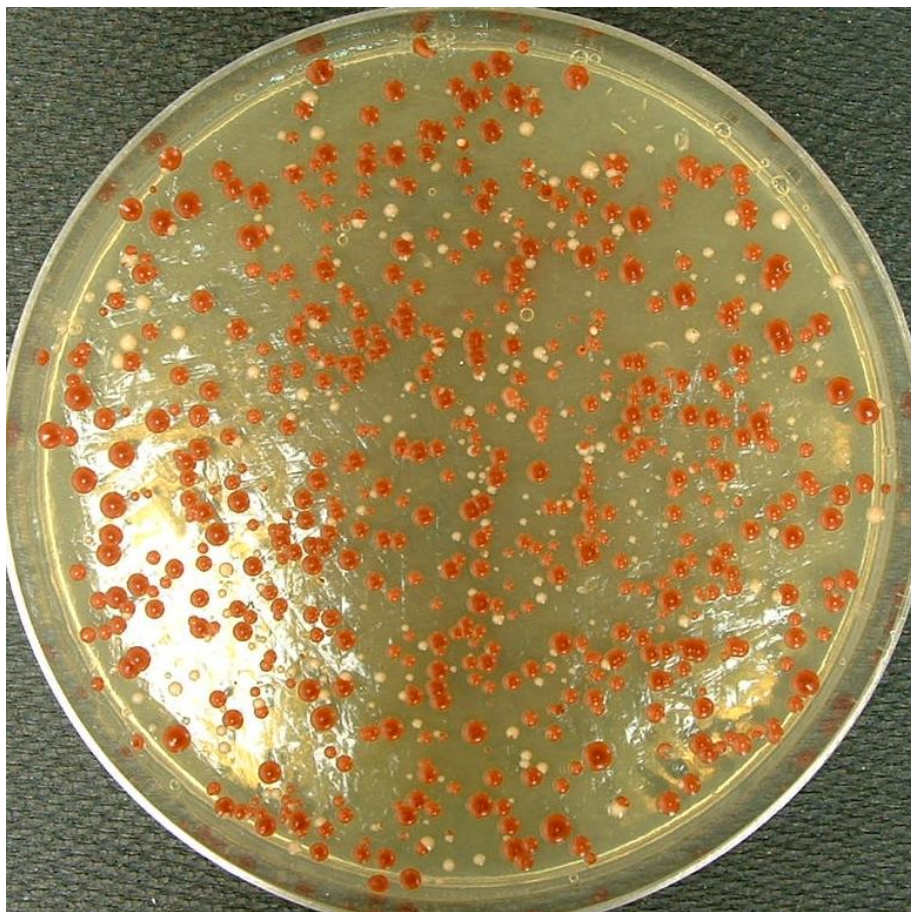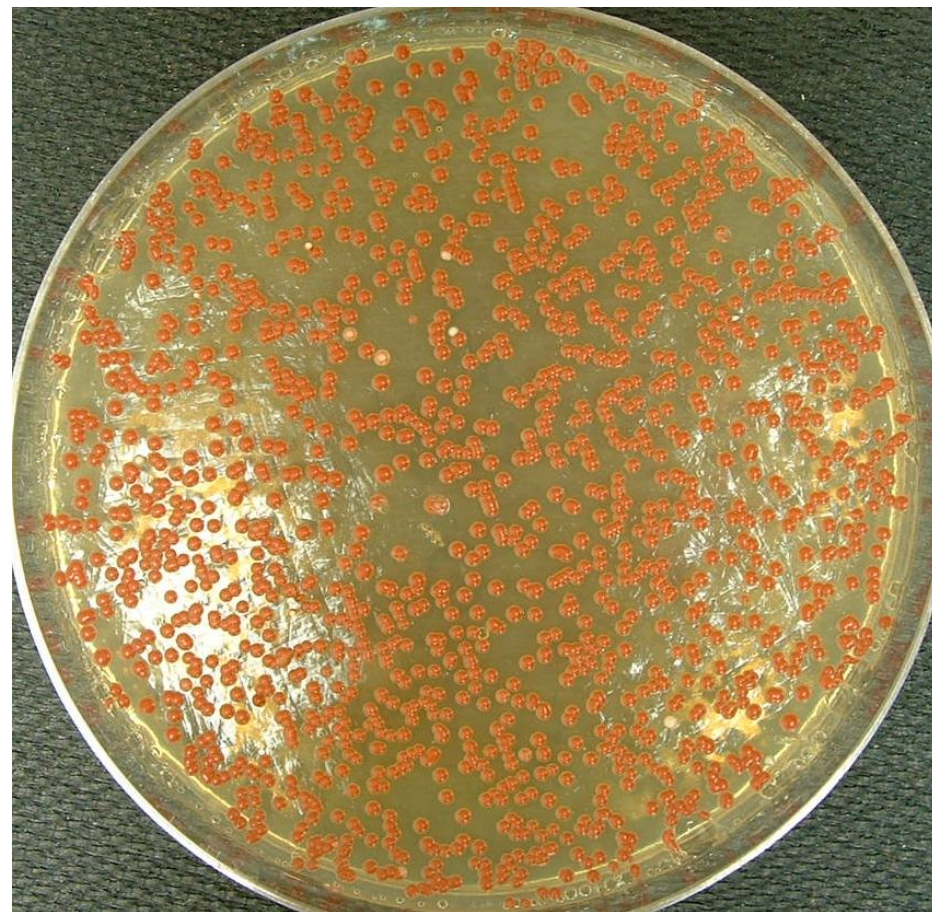

Supplement: AAC.02394-12_zac011132322so1.pdf [file AAC.02394-12_zac011132322so1.pdf]
